# Supplementary material for: Reaction mechanism of a PbS-on-ZnO heterostructure and enhanced photovoltaic diode performance with an interface-modulated heterojunction energy band structure
Source: Royal Society of Chemistry journal article supplement (doi:10.1039/c5cp06150d), 2016-01-01
Supplement: c5cp06150d1.pdf [file c5cp06150d1.pdf]

Supporting Information for

Received 00th January 20xx,  
Accepted 00th January 20xx

DOI: 10.1039/x0xx00000x

www.rsc.org/

**Reaction mechanism of PbS-on-ZnO heterostructure and enhanced photovoltaic diodes performance with interface modulated heterojunction energy band structure**

Haili Li,<sup>a</sup> Shujie Jiao,<sup>a,\*</sup> Jinxian Ren,<sup>a</sup> Hongtao Li,<sup>a</sup> Shiyong Gao,<sup>a</sup> Jinzhong Wang,<sup>a</sup> Dongbo Wang,<sup>a</sup> Qingjiang Yu,<sup>a</sup> Yong Zhang,<sup>a</sup> and Lin Li<sup>b</sup>

Supporting information S1:

We investigated the influence of the SILAR deposition sequence on the light absorption properties of the PbS-ZnO heterostructure. The absorption of the films increases and extends into the visible region of the spectrum with an increasing number of SILAR cycles. Immersion time dependence light absorption spectra of Pb-S-ZnO and S-Pb-ZnO are shown in Figure S1. The light absorption increases with SILAR time, which can be attributed to the increasing thickness of PbS QDs layer. One important thing needed to be pointed out is that the light absorption increase more quickly for S-Pb-ZnO than Pb-S-ZnO. This is in good accordance with the dense distribution of PbS QDs on ZnO.

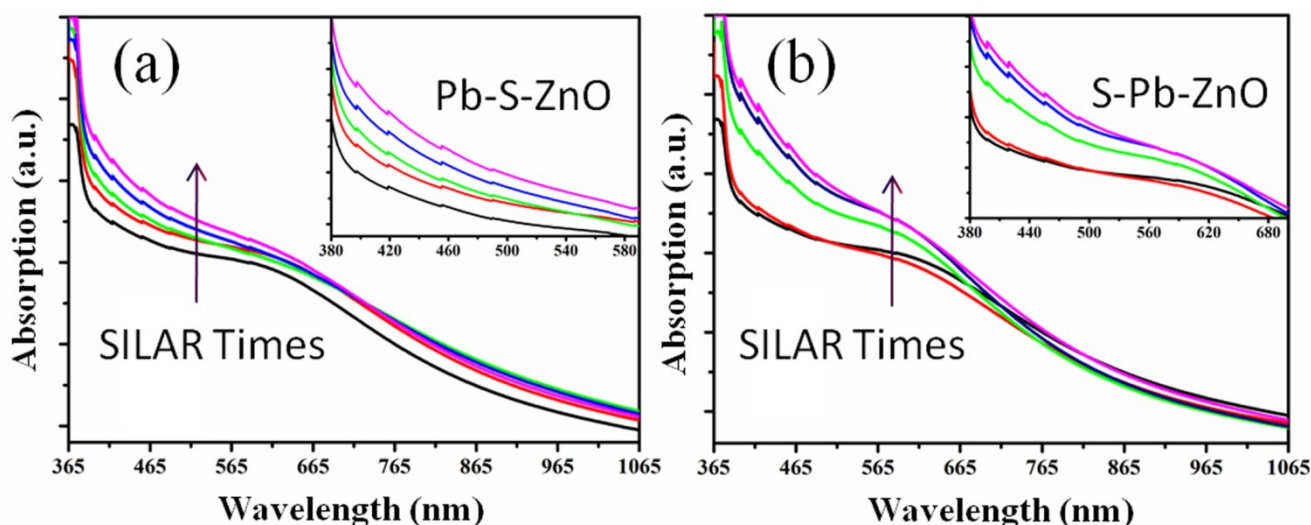

Figure S1. Immersion time dependence light absorption spectra of Pb-S-ZnO and S-Pb-ZnO.

Supporting information S2:

Figure S2 is band structure diagrams of Pb-S-ZnO at different bias voltages under green light illumination. At positive voltage, the diffusion of carriers' is prompted and majority carrier transportation domains the current variations. When the negative voltage is applied, the current mainly dependent on minority transportation. Owing to the small amount of minority carriers, the

<sup>a</sup> School of Materials Science and Engineering, Harbin Institute of Technology, Harbin 150001, P. R. China

<sup>b</sup> Key laboratory for Photonic and Electronic Bandgap Materials, Ministry of Education, Harbin Normal University, Harbin, 150025, P. R. China

Corresponding author: shujiejiao@gmail.com

current shows nearly constant values with the increasing voltage. The variation of current curve at positive voltage is believed to be caused by the formation of insulating PbO layer, which leads to the formation of inversion layer.

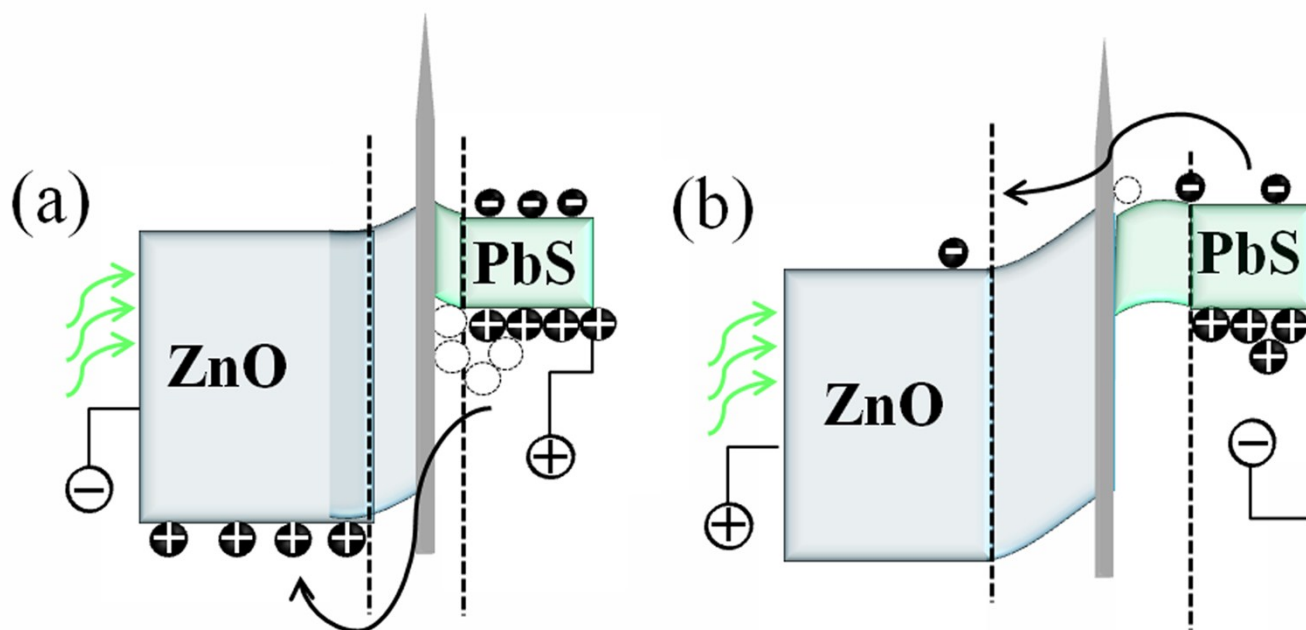

Figure S2. Band structure diagrams of Pb-S-ZnO at different bias voltages under green light illumination.
